# Supplementary material for: Gellan gum capped silver nanoparticle dispersions and hydrogels: cytotoxicity and in vitro diffusion studies
Source: Royal Society of Chemistry journal article supplement (doi:10.1039/c1nr10957j), 2011-12-02
Supplement: c1nr10957j.pdf [file c1nr10957j.pdf]

## Gellan gum capped silver nanoparticle dispersions and hydrogels: cytotoxicity and *in vitro* diffusion studies

S. Dhar,<sup>a,c</sup> P. Murawala,<sup>a</sup> A. Shiras,<sup>\*b</sup> V. Pokharkar,<sup>\*c</sup> B. L. V. Prasad<sup>\*a</sup>

<sup>a</sup>Materials Chemistry Division, National Chemical Laboratory, Pune-411 008, India.

<sup>b</sup>National Centre for Cell Sciences, Pune-411 007, India

<sup>c</sup>Poona College of Pharmacy, Bharati Vidyapeeth University, Pune-411 038

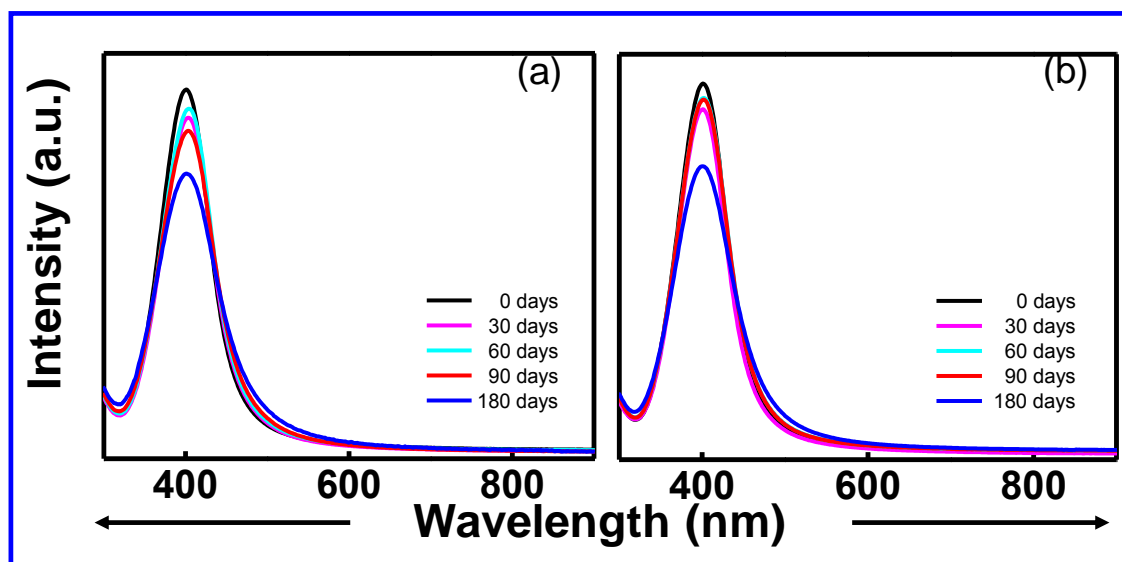

**Fig. ESI-1.** Stability study of gellan gum (0.02% w/v) reduced silver nanoparticles,  $t = 6$  months. (a) 25°C/65% RH (room temperature) and (b) 2-8°C (refrigerated).

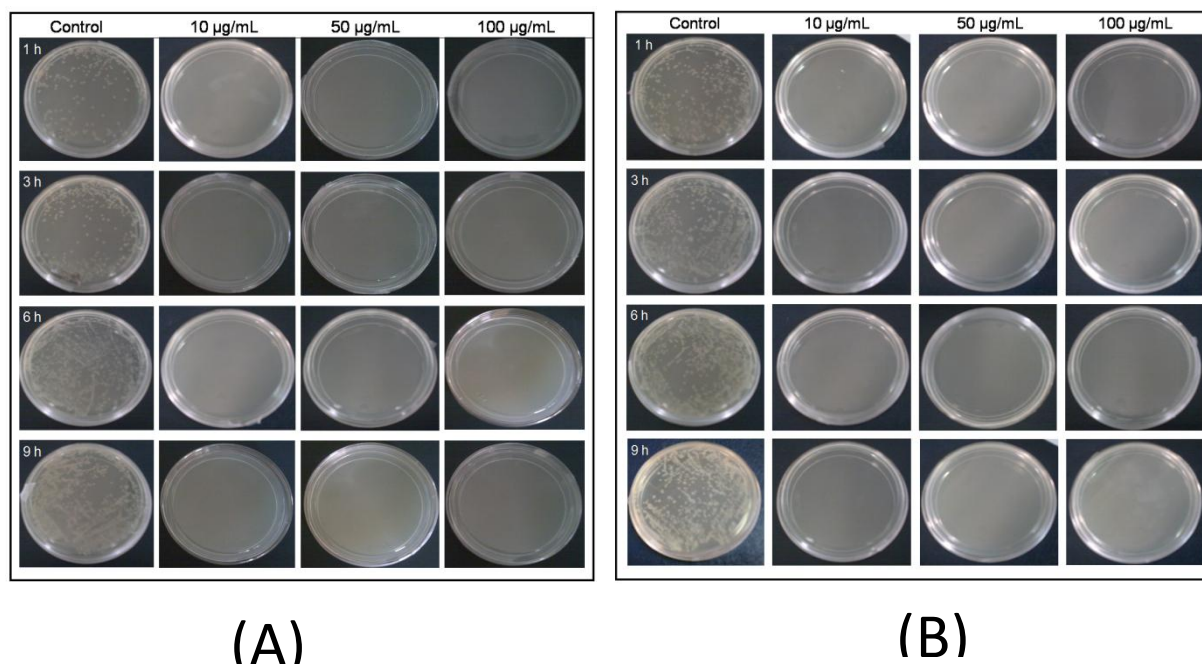

**Fig. ESI-2.** (A) Luria-Agar plates showing antibacterial activity of different concentrations of AgNPs (10 µg/mL, 50 µg/mL and 100 µg/mL) against (A) *B. subtilis* and (B) *E. coli* at different time intervals.
